RESEARCH ARTICLE

# Redefining and estimating the early-phase reproduction ratio for epidemic outbreaks in spatially structured populations

Boxuan Wang, Eugenio Valdano \*

Sorbonne Université, INSERM, Institut Pierre Louis d'Epidémiologie et de Santé Publique, Paris, France

\* [eugenio.valdano@inserm.fr](mailto:eugenio.valdano@inserm.fr)

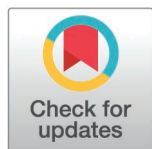

## Abstract

Assessing epidemic risk following pathogen introduction is crucial in infectious disease epidemiology. Risk is commonly encoded through reproduction ratios, which underpin operational decision-making. In spatially structured populations, both local and cross-community transmission shape epidemic trends, a feature that standard reproduction ratios fail to capture simultaneously. Here, we use multitype branching processes to define the outbreak reproduction ratio  $R^{ob}$ , a reformulation applicable across pathogens, epidemics and transmission routes, enabling community-specific, but system-aware, risk assessment. We test  $R^{ob}$  on respiratory pathogens and estimate it prior to emergence using aggregated contact matrices, enabling spatially resolved risk assessment even with limited data and computational resources. Estimates across countries reveal heterogeneous spatial risk, not captured by standard metrics.  $R^{ob}$  can also be estimated from early-phase surveillance data, as we show using SARS-CoV-2 in Canada, where it correctly identifies community risk.  $R^{ob}$  represents a concise and practicable framework for interpreting epidemic risk in spatially structured populations.

## OPEN ACCESS

**Citation:** Wang B, Valdano E (2026) Redefining and estimating the early-phase reproduction ratio for epidemic outbreaks in spatially structured populations. PLoS Comput Biol 22(7): e1014425. <https://doi.org/10.1371/journal.pcbi.1014425>

**Editor:** James M McCaw, The University of Melbourne, AUSTRALIA

**Received:** January 28, 2026

**Accepted:** June 9, 2026

**Published:** July 1, 2026

**Peer Review History:** PLOS recognizes the benefits of transparency in the peer review process; therefore, we enable the publication of all of the content of peer review and author responses alongside final, published articles. The editorial history of this article is available here: <https://doi.org/10.1371/journal.pcbi.1014425>

**Copyright:** © 2026 Wang, Valdano. This is an open access article distributed under the terms of the [Creative Commons Attribution License](https://creativecommons.org/licenses/by/4.0/), which permits unrestricted use, distribution,

## Author summary

Early risk assessment for infectious disease epidemics requires estimating what happens when a pathogen emerges, or is introduced, in a population. The most common risk indicator is the reproduction ratio, the expected number of secondary infections that a single case generates. Its standard estimators, however, may fail in spatially structured populations, because they focus either on system-level risk assessment, ignoring heterogeneities in local transmissibility, or on community-specific features, ignoring the effect of the spatial contact network. Concretely, introduction in communities with sustained local transmission does favor epidemic emergence, but low-risk communities may still contribute to epidemic emergence if connected to high-risk areas. Here we define a new

and reproduction in any medium, provided the original author and source are credited.

**Data availability statement:** All relevant data supporting the findings of this study are available in R\_ob\_code at [https://github.com/peasantxuan/R\\_ob\\_code](https://github.com/peasantxuan/R_ob_code).

**Funding:** This study was partially supported by Horizon Europe grant SIESTA (101131957) and the ANR JCJC grant DiscoReel (ANR-25-CE45-5346-01) to E.V. The funders had no role in study design, data collection and analysis, decision to publish, or preparation of the manuscript.

**Competing interests:** The authors have declared that no competing interests exist.

indicator, the outbreak reproduction ratio, to measure the epidemic risk associated with pathogen emergence or introduction in a spatially structured population. Our indicator preserves the familiar interpretation of a reproduction ratio while accounting for spatially structured contacts across the system. We show that the outbreak reproduction ratio can be computed from population-level spatial contact data before an outbreak occurs, or estimated from early transmission data. Applications to simulated epidemics and early SARS-CoV-2 transmission in Canada show that reproduction ratio reveals spatial patterns of risk that are missed by currently employed indicators.

## Introduction

Assessing and predicting the conditions that determine whether a newly emerged or introduced pathogen will trigger a large-scale epidemic is central to epidemic preparedness [1]. One of the most popular metrics in epidemiology to assess epidemic risk is the reproduction ratio,  $R$ , which encodes the number of secondary infections in transmission chains [2]. Importantly, if  $R$  is above one, the outbreak may grow into a large-scale epidemic, and the probability of that happening, and the size of the resulting outbreak, increase with the value of  $R$  [3]. The reproduction ratio has been used across epidemics, diseases and regions to both understand and predict the effect of public health interventions. Examples abound. The very high reproduction ratio of measles has long driven vaccination policies targeting  $\geq 95\%$  coverage [4]. During the 2014–2016 Ebola outbreak in West Africa, estimates of  $R$  were crucial to assess population-level interventions [5]. In 2020, early estimates of the reproduction ratio of COVID-19 informed long-range and short-range mobility restrictions across the globe [6–8]. Recently,  $R$  is increasingly being used to monitor arboviral risk (dengue, chikungunya, Zika) driven by climate change [9].

Existing theoretical frameworks broadly estimate the reproduction ratio either from statistical inference on surveillance data, e.g., timeseries of reported cases [10–15], from transmission models that integrate contact and mixing data of the population [16–21], or more recently on phylogenetic data [22].

Estimating the reproduction ratio before, or at the start of, a new outbreak is particularly important to gauge its potential to cause a large-scale epidemic. It is also when it is the hardest to estimate, because this is when epidemic evolution is most sensitive to stochastic effects [23,24] and heterogeneities in the underlying contact structure [25–27].

The challenge becomes even greater in spatially structured populations, composed of distinct communities connected by mobility. Existing frameworks face two main limitations. First, those providing local estimates of  $R$  neglect that infections arise not only from local transmission but also from mobility-driven interactions between communities [9,28]. When this distinction is made, models typically focus on estimating time-varying transmission intensity after epidemic circulation has already been established at the system level [15,29,30], or they separate only local

and imported cases [31–34]. These approaches primarily aim at inferring transmission dynamics from incidence data, whereas our objective is instead to quantify the probability that an early stochastic introduction event triggers a large-scale epidemic in a spatially structured population, including settings where incidence data remain sparse or unavailable. As a consequence, they do not explicitly capture the source-sink dynamics sustaining epidemic emergence and persistence [35,36] or the long-range spread to previously unaffected regions [37,38].

Second, frameworks that explicitly incorporate spatial, mobility-driven contact networks typically yield a single system-wide value of  $R$  [15,17,39]. Such global metrics provide limited information on the epidemic outcome following introduction in a specific community, failing to identify potential outbreak hotspots and offering only a global risk measure once circulation is already established. As a result, obtaining local yet system-aware estimates of epidemic risk for emerging outbreaks often depends on large computational models that require extensive, heterogeneous data on disease natural history, host behavior, and mobility [40,41]. Such data are frequently unavailable, time-consuming to collect, and computationally expensive to process, delaying or preventing timely assessment in resource-limited settings. Moreover, the resulting metrics may often be less generalizable and harder to interpret than the reproduction ratio, limiting their practical use by public health authorities.

It is therefore essential to develop a theoretical framework that jointly captures local transmission conditions and the meso- and large-scale structures linking communities through mobility. To this end, we introduce the outbreak reproduction ratio ( $R^{\text{ob}}$ ): a parsimonious, interpretable, and computationally efficient indicator for rapid assessment of epidemic potential.  $R^{\text{ob}}$  quantifies outbreak risk as a function of the site of pathogen emergence or introduction, incorporating both local dynamics and system-level source-sink effects, and can be estimated either preemptively—before the pathogen arrives, or during the early stages of an outbreak.

We define  $R^{\text{ob}}$  using multi-type branching processes and demonstrate that it can be estimated both from low-resolution, aggregated spatial contact data collected pre-emptively before the outbreak, as well as from early epidemic surveillance data.

We validate the newly defined  $R^{\text{ob}}$  through synthetic epidemics informed with data-driven spatial contact networks, and we apply it to three case studies to showcase its potential. First, we simulate an epidemic of a directly transmitted respiratory pathogen in Italy and show that  $R^{\text{ob}}$  can be accurately estimated from surveillance data, and that it reveals systematic biases in traditional epidemiological indicators. Second, we extend the analysis across multiple countries again using data-driven contact networks, linking  $R^{\text{ob}}$  to demographic and spatial patterns and highlighting the limitations of both local and global reproduction metrics in structured populations. Finally, we study early SARS-CoV-2 transmission in Canada using transmission chain data and demonstrate that  $R^{\text{ob}}$  correctly identifies outbreak hotspots consistent with historical epidemic outcomes.

## Results

To model the early evolution of epidemic outbreaks, we use branching processes – a standard framework that explicitly captures the stochastic dynamics dominating the initial phase of epidemic spread [25]. We consider a population composed of  $N$  spatial communities, where transmission can occur locally in each community and also across communities. We encode spatial transmission patterns in the  $N$ -dimensional *reproduction operator*  $\mathbf{R}$ , whose entry  $R_{ij}$  encodes the expected number of secondary infections that an infected resident of  $j$  generates among residents of  $i$  [15]. The spectral radius of  $\mathbf{R}$ , which under realistic conditions is also a positive eigenvalue, is the reproduction ratio of the system, which, following Ref. [15], we will call *reference reproduction ratio*  $R^{\text{ref}}$ , and determines the dynamics of the epidemic once it is established.

Notably, the reproduction operator is independent and agnostic of the disease’s natural history and the demographic structure of the population. It can thus be applied to any transmissible disease and transmission route — direct, vector-borne, or otherwise – provided that sufficient data exist to estimate its entries reliably. In the case studies below, we show how  $\mathbf{R}$  can be reconstructed and used for directly transmitted respiratory pathogens.

We can formalize infection occurring within and across spatial communities as a multitype branching process [42], where the *type* of the offspring encodes the spatial communities in which the infection is generated.

To quantify the epidemic potential of a pathogen emergence (or introduction) event in community  $i$  we wish to compute the probability  $p_i$  that this leads to a major epidemic in the system (*epidemic probability*). This is, in our framework, the probability that the branching process does not go extinct. We remark that the branching process is a good model of disease spread only before  $\mathbf{R}$  effectively changes due to the epidemic dynamics (e.g., the accumulation of immunity) or to external interventions.  $p_i$  is thus a good indicator for the early evolution, which is of interest of us, telling us whether the outbreak will reach the epidemic phase or not.

Assuming the number of secondary infections is Poisson-distributed with expectation value  $R_{ji}$ , the epidemic probability obeys the following equation:

$$p_i = 1 - \exp\left(-\sum_j R_{ji}p_j\right), \quad (1)$$

Derivation of this equation is shown in the Methods, and its numerical validation is provided in Fig D in [S1 Appendix](#). For completeness, the Methods and [S1 Appendix](#) report the theory and calculations in the case of negative binomially-distributed secondary infections, to fully account for the well-documented overdispersion of secondary infections, as well as heterogeneity in the duration of the infectious period. We remark, however, that the Poisson assumption – an analytically simpler, limiting case of the negative binomial – is justifiable also in many real settings, as overdispersion is often introduced as an effective proxy for effects due to structured populations, which we already model explicitly [22,25]. These structures can be purely spatial, which we explicitly consider in this study, or arise from other sources such as household or classroom clustering [43]. Our framework is agnostic to the origin of the underlying structure and can also be applied to alternative forms of heterogeneity [20]. As a result, most additional sources of overdispersion can be incorporated through the explicit modeling of the relevant contact structure, without requiring changes to the theoretical formulation. Instead, for sources of overdispersion that cannot be modeled through population stratification, we refer to the explicit negative-binomial theory (see Methods and [S1 Appendix](#)).

In the case of no inter-community transmission ( $R_{ij} = 0 \ \forall i \neq j$ ), the epidemic probability is well-known [3], and has a closed-form analytical expression:  $p_i = 1 + \mathcal{W}(-R_{ii}e^{-R_{ii}}) / R_{ii}$ , where  $\mathcal{W}$  is the principal branch of the Lambert-W function. Specifically, when  $R_{ii} < 1$ , the epidemic probability is zero, as no major epidemic can occur below the epidemic threshold. Above  $R_{ii} = 1$ , the epidemic probability increases sharply, and monotonously, with  $R_{ii}$ . For this reason, in isolated communities the local reproduction ratio  $R_{ii}$  is also a reliable indicator of an outbreak's potential to develop into a major epidemic, and is routinely used for this purpose [9]. Let us now assume that infected residents of community  $i$  can also transmit infection to residents of another community  $j$  ( $R_{ji} > 0$ ,  $R_{ij} > R_{ii}$ ), and that no other inter-community connections exist –this is effectively a simplified two-community toy model where residents of  $i$  can generate infections in  $j$  and not vice versa. In this case, the epidemic probability in  $i$  is  $p_i = 1 + \mathcal{W}(-R_{ii}e^{-R_{ii}-R_{ji}p_j}) / R_{ii}$ . [Fig 1a](#) shows  $p_i$  as a function of the coupling term  $R_{ji}$ . It becomes positive even when  $R_{ii} < 1$ , indicating that the local reproduction ratio is no longer a reliable measure of epidemic risk. At the same time,  $p_i$  differs from  $p_j$  and remains small across a wide range of  $R_{ji}$  values, showing that the system's reference reproduction ratio – equal to  $R_{ij}$  in this simple case – is also an unreliable predictor of outbreak probability in  $i$ . Finally, [Fig 1a](#) illustrates that the total average number of secondary infections generated by residents of  $i$  ( $R_{ii} + R_{ji}$ ) likewise fails to capture epidemic risk. These observations extend to complex spatial structures. In [Fig 1b](#), we estimated the epidemic probability of a directly transmitted respiratory pathogen (such as influenza, SARS-CoV-2, or a newly emerging strain) across Italian provinces (ADM-2 level) for varying reference reproduction ratios. We used spatial contact data provided by Meta to model the reproduction operator  $\mathbf{R}$ . Details are provided in Methods. [Fig 1b](#) shows that

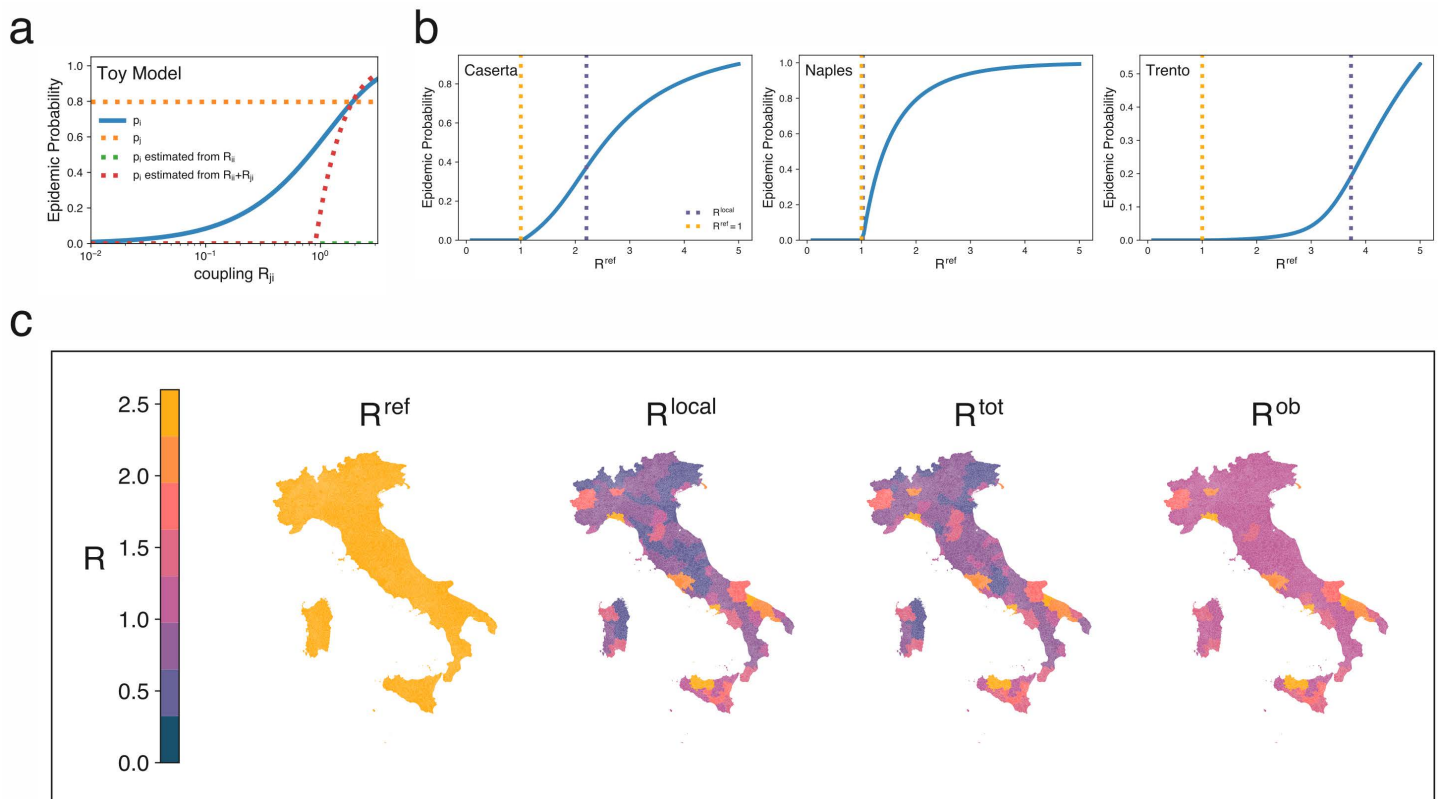

**Fig 1. Epidemic probability and outbreak reproduction ratio  $R^{ob}$ .** **a.** Epidemic probability in community  $i$  ( $p_i$ ) in a two-community toy model where  $i$  is connected to  $j$  with coupling strength  $R_{ij}$ : average number of infections that an infected resident of  $i$  generates in  $j$ . The x-axis is  $R_{ij}$  and the other parameters are fixed to  $R_i = 0.1$  and  $R_j = 2$ . **b.** Epidemic probability in the Italian provinces (ADM-2) of Caserta, Naples, Trento, computed using colocation data and plotted against the country's system-level reference reproduction ratio ( $R^{ref}$ ). Dashed lines indicate  $R^{ref} = 1$  (global epidemic threshold) and local threshold values ( $R_i = 1$ ). **c.** Reproduction ratio estimates in Italian provinces assuming  $R^{ref} = 2.5$ . Different maps display different indicators and notably compare the outbreak reproduction ratio  $R^{ob}$  to commonly used risk metrics:  $R^{ref}$ , the local  $R$  defined as the average number of locally generated infections, and  $R^{tot}$  defined as the average number of infections generated anywhere by a resident of a specific community (see main text for mathematical definitions). Base map data are from Natural Earth (<https://www.naturalearthdata.com>), which are in the public domain and free of copyright restrictions.

<https://doi.org/10.1371/journal.pcbi.1014425.g001>

epidemic risk varied markedly across communities, and that neither local ( $R_{ij}$ ) nor global ( $R^{ref}$ ) estimates reliably capture it. In the province of Trento, the epidemic probability remains near zero even when the system reproduction ratio  $R^{ref}$  is well above one, yet rises significantly before the local  $R_{ij}$  exceeds unity, showing that both global and local measures may misrepresent risk. Naples — one of Italy's largest cities — exhibits the opposite pattern, with the epidemic probability increasing sharply as soon as  $R^{ref} > 1$ . Caserta, adjacent to Naples, shows intermediate behavior:  $p_i$  becomes positive just above  $R^{ref} = 1$  but grows more slowly than in Naples, and without a clear relation to  $R_{ij}$ . Together, these results demonstrate that both local and system-level reproduction ratios can yield misleading assessments of epidemic risk in spatially structured populations.

### The outbreak reproduction ratio $R^{ob}$

These findings show that the definitions of the reproduction ratio based trivially on the average numbers of secondary infections — namely the local reproduction ratio  $R_{ij}$  and the total reproduction ratio  $R_i^{tot} = \sum_j R_{ij}$  — fail to capture the

contribution of mobility-driven transmission. Conversely, system-level measures such as  $R^{\text{ref}}$  overlook local heterogeneities that critically shape epidemic risk.

To overcome this, we introduce the *outbreak reproduction ratio* ( $R^{\text{ob}}$ ) as the average difference between the number of secondary infections needed to set off a large-scale epidemic and the number of secondary infections that lead to a minor outbreak. Consider an index infection in community  $i$  and denote its number of secondary infections in  $j$  as  $X_{i \rightarrow j}$ . By definition,  $R_{ji} = \mathbb{E}[X_{i \rightarrow j}]$ . Then,  $\mathbb{E}[X_{i \rightarrow j} | \text{epidemic}]$  and  $\mathbb{E}[X_{i \rightarrow j} | \text{extinction}]$  as the expected values conditioned on the two epidemic outcomes. In the framework of the branching process the distinction is on whether the process goes extinct or not, the latter happening with probability  $p_i$ . In the case of realistic epidemic process we will show that this distinction can be made by choosing a cutoff on the attack rate and the empirical means are weakly sensitive to the chosen cutoff. The formal definition of the new metric is thus

$$R_i^{\text{ob}} = \mathbb{E} \left[ \sum_j X_{i \rightarrow j} | \text{epidemic} \right] - \mathbb{E} \left[ \sum_j X_{i \rightarrow j} | \text{extinction} \right]. \quad (2)$$

To study the properties of the outbreak reproduction ratio it is convenient to prove two equivalent definitions in terms of epidemic probabilities (proof in Methods):

$$R_i^{\text{ob}} = -\frac{\log(1 - p_i)}{p_i} = \sum_j R_{ji} \frac{p_j}{p_i}. \quad (3)$$

We emphasize that  $R^{\text{ob}}$  is not a community-specific analogue of the spectral radius of  $R$ , nor an eigenvector-based sensitivity measure of  $R^{\text{ref}}$ . The spectral radius  $R^{\text{ref}} = \rho(R)$  characterizes the linearized asymptotic dynamics of the epidemic and determines whether a system-level diffusion can be sustained. By contrast,  $R^{\text{ob}}$ , defined from the extinction probability of a branching process, is a nonlinear, seed-specific quantity: first the coupled fixed-point problem for the epidemic probabilities is solved, and then the resulting  $p_i$  is mapped onto the scalar reproduction ratio that an isolated community would need to have the same survival probability. A closed-form analytical solution of  $p_i$ , and thus  $R_i^{\text{ob}}$  is possible only in the case of isolated communities by means of the Lambert-W function. In the spatially coupled systems the epidemic probabilities are determined by the full multidimensional fixed-point system. The previously discussed two-community system further illustrates the distinction between  $R_i^{\text{ob}}$  and standard next-generation-matrix quantities: in that example  $R^{\text{ref}} = R_{ji}$  is unchanged by the one-way coupling  $R_{ji}$ , whereas the outbreak probability  $p_i$ , and therefore  $R_i^{\text{ob}}$ , changes with  $R_{ji}$ . More in detail, the first expression in Eq. (3) shows that  $R_i^{\text{ob}}$  can be interpreted as the local reproduction ratio that community  $i$  would require, if isolated, to yield the same epidemic probability. In this sense,  $R_i^{\text{ob}}$  translates a seed-specific outbreak probability into the familiar scale of a reproduction ratio, while retaining the effect of nonlocal transmission through the dependence of  $p_i$  on the full coupled system. The second expression in Eq. (3) instead shows that  $R^{\text{ob}}$  equals the sum of the average number of infections generated by residents of  $i$  across all communities, each weighted by the relative outbreak risk of those communities with respect to  $i$ . In this sense,  $R^{\text{ob}}$  generalizes the total reproduction ratio  $R_i^{\text{tot}}$ , weighting infections according to their potential to initiate a large-scale epidemic rather than treating all secondary transmissions equally. For example, generating infections in a community ( $j$ ) where the probability of onward epidemic is substantially larger than the local probability ( $p_j \gg p_i$ ) boosts the outbreak reproduction ratio of  $i$ , showing that local estimates  $R_{ji}$  may substantially underestimate epidemic risk. At the same time, if the probability of outbreak in  $j$  is small ( $p_j \ll p_i$ ) it will contribute marginally to risk in  $i$  (i.e., to  $R_i^{\text{ob}}$ ), even if  $R_{ji}$  is large and contributes substantially to  $R_i^{\text{tot}}$ .

We validated Eq. (3) against the simulated early epidemic phase of a directly-transmitted, respiratory pathogen spreading in Italy, using the same data as in Fig 1 see details in the Methods. Importantly, we set a cutoff  $M$  on the total size of the epidemic to discriminate between epidemics (size exceeding  $M$ ) and minor events (size below  $M$ ). We computed

$R^{ob}$  from Eq. (2) using sample means from different stochastic realizations, then compared it to the one obtained via the epidemic probabilities in Eq. (3). Fig 2a shows the comparison for six Italian provinces, proving that they match for cutoff values spanning orders of magnitude, and even for relatively low cutoff values. We further verified that our theoretical predictions remain accurate under overdispersed transmission by considering a negative-binomial offspring distribution (see Methods), with results shown in Fig F in S1 Appendix. This confirms that our framework remains valid even in the presence of superspreading.

We now show that  $R^{ob}$  behaves consistently as a reproduction ratio by demonstrating that it reduces to known quantities in limiting cases, and has the same critical behavior. First, the epidemic threshold of the system ( $R^{ref} = 1$ ) correctly maps to  $R^{ob} = 1$ . Specifically, we prove in the Methods that, when  $R^{ref} < 1$ , then  $R_i^{ob} = R^{ref}$  and, when  $R^{ref} > 1$ , every  $R_i^{ob} > 1$ . Second, from the second expression in Eq. (3), it follows directly that  $R_i^{ob} = R_{ij}$  when the community is isolated, meaning that the outbreak reproduction ratio coincides with the standard local reproduction ratio. Finally, if all communities share the same total reproduction ratio ( $R_i^{tot} = R^{ref}$  for all  $i$ ), then  $R_i^{ob} = R^{ref}$  for all  $i$  – see the Methods for the proof. This result agrees with Ref. [15], which showed that systems lacking spatial heterogeneity in transmission potential behave effectively as a single population, whose epidemic dynamics is fully determined by  $R^{ref}$ .

When instead transmission potential is heterogeneous, the outbreak reproduction ratio can also quantify spatial risk heterogeneity. From Eq. (3) and the Collatz-Wielandt inequalities [44], it follows that  $\min_i R_i^{ob} \leq R^{ref} \leq \max_i R_i^{ob}$ . This relation shows that the outbreak reproduction ratios of individual communities are distributed around the system-level value  $R^{ref}$ : some communities face a lower epidemic risk than predicted by global estimates, while others face a higher one.

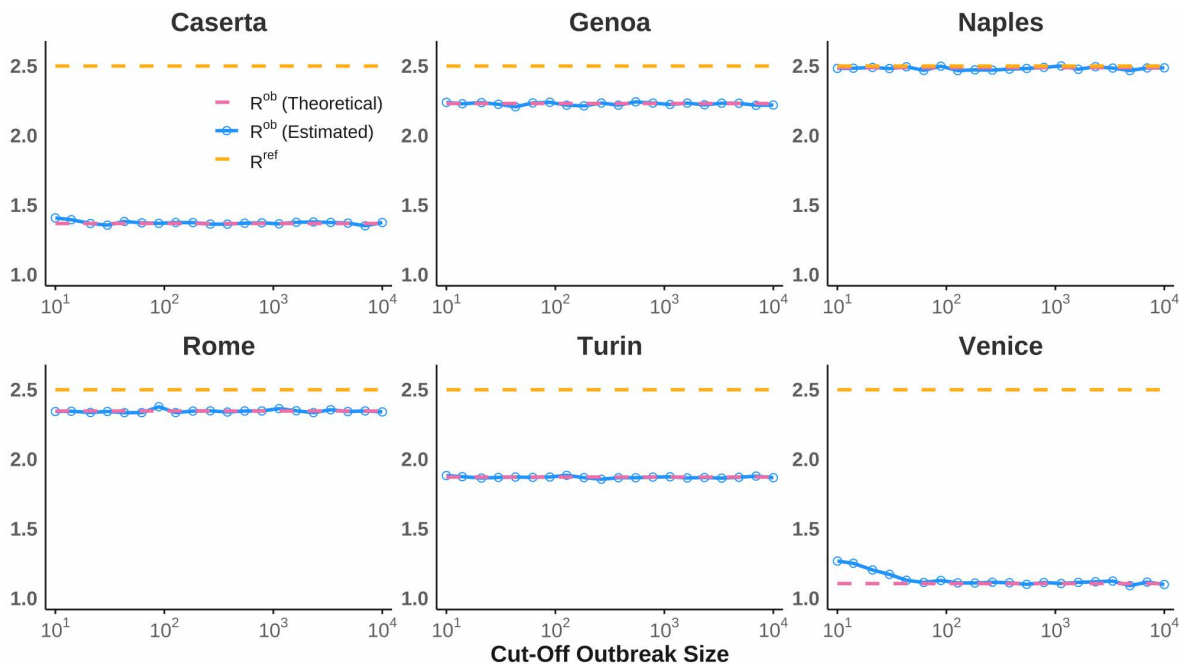

**Fig 2. Validation of Eq. (2).** The plots compare the theoretical  $R^{ob}$  value calculated from epidemic probabilities (Eq. (3), pink) against expectation values on outbreak data (Eq. (2), blue). Synthetic epidemic data were generated using colocation data from Italy. The x-axis represents the cut-off size used to discriminate an epidemic from extinct minor outbreak. Here,  $R^{ref} = 2.5$  and expectations values were computed over 100,000 stochastic realizations.

<https://doi.org/10.1371/journal.pcbi.1014425.g002>

### Estimation of the outbreak reproduction ratio from transmission chains

To estimate  $R^{ob}$  from surveillance data, one must account for the fact that only a single outbreak is observed, making it impossible to compute the empirical means in Eq. (2) across multiple realizations. We addressed this by first estimating the relevant entries of  $\mathbf{R}$  directly from an observed transmission chain, and then computing the outbreak reproduction ratio from Eq. (3) using this estimated matrix. The detailed methodology is provided in the Methods. Fig 3 illustrates the robustness of our estimation approach using data from simulated epidemics seeded in six different Italian provinces. Expectedly, estimates were noisy and tended to overestimate  $R^{ob}$  for small outbreaks, reflecting a well-known selection effect whereby only transmission chains with above-average early growth avoid stochastic extinction and are therefore observed, a mechanism often associated with early transmission concentrated in higher-risk groups [45]. They instead became more precise and tend to the corresponding theoretical values as the size of the outbreak increases. Crucially, the accuracy of the  $R^{ob}$  estimates depended both on the location where the outbreak originated and on the community for which  $R^{ob}$  was being estimated. Specifically, estimation was broadly more accurate (and required smaller outbreaks) in major cities such as Rome and Naples. Also, accuracy was maximal if  $R^{ob}$  was inferred for the seeding community itself, and reliable estimates could be obtained even from relatively small outbreaks. This reflects the fact that early infections are concentrated in or near the outbreak origin. Spatial proximity, as a proxy for network connectivity, further modulated accuracy: For example,  $R^{ob}$  in the province of Caserta could be estimated accurately from outbreaks seeded in neighboring Naples

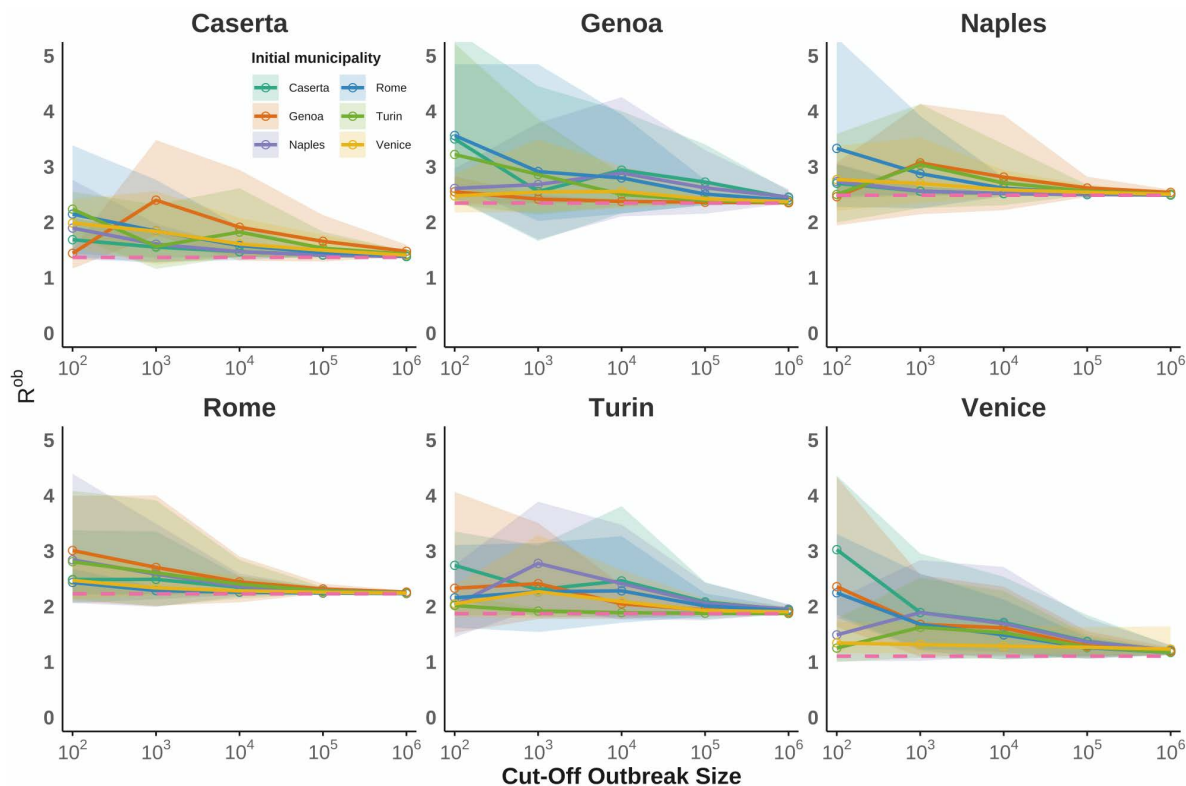

**Fig 3. Estimation of  $R^{ob}$  from outbreak data.** Each panel shows the estimated  $R^{ob}$  for a specific province as a function of the cumulative outbreak size available for analysis (x-axis), and of the seeding province (legend). Shaded regions span 90% uncertainties. Theoretical values (Eq. (3)) are represented by pink dashed lines.

<https://doi.org/10.1371/journal.pcbi.1014425.g003>

even for relatively small outbreaks (on the order of  $10^3$  infections), whereas outbreaks seeded in distant provinces such as Genoa required substantially larger outbreak sizes (exceeding  $10^5$  infections), and therefore longer observation periods, to achieve comparable estimation accuracy (Fig 3).

These results highlight that the reliability of  $R^{ob}$  estimation is governed by both the size of the available dataset and the interplay between the outbreak's origin and the underlying spatial network structure.

### Estimating outbreak risk across countries and communities using spatial contact data

Equation (3) enables the estimation of epidemic risk even before outbreaks occur, by informing  $\mathbf{R}$  with data on disease characteristics and the population-level spatial contact data introduced earlier (see also the Methods). Using this approach, we estimated epidemic risk across 943 communities in 13 countries, showing that conventional metrics fail to capture the heterogeneity and distribution of epidemic risk, whereas  $R^{ob}$ , when combined with large-scale contact data, effectively captures this heterogeneity at minimal computational cost. We explored three reference reproduction numbers:  $R^{ref} = 1.5$ , consistent with estimates for the 2009 H1N1 influenza pandemic strain [46];  $R^{ref} = 2.5$ , corresponding to early estimates for the historical SARS-CoV-2 strain [6]; and a higher  $R^{ref} = 4$ , representing a hypothetical highly transmissible emerging virus. The countries included in the study appear in Fig 4a. Fig 4b displays their gross domestic product (GDP) per capita and Fig 4c their urbanization profile in terms of the *DEGURBA* degree of urbanisation, which classifies territories in seven categories according to a rural/urban continuum, accounting for population size and density [47].

Values of  $R^{ob}$  were highly heterogeneous in all countries (Fig 4d), indicating that country-level risk estimates are poor predictors of local epidemic potential. In several countries, epidemic risk was concentrated in a small number of communities with  $R^{ob} > R^{ref}$ , while the majority of communities exhibited  $R^{ob}$  values close to one, implying a low probability that local emergence would trigger a large-scale outbreak. Other countries, such as Italy, displayed a broad distribution of  $R^{ob}$  centered around  $R^{ref}$ , indicating heterogeneous but more evenly distributed risk. In all cases, increasing  $R^{ref}$  led to a widening of the  $R^{ob}$  distribution, with a marked increase in the maximum  $R^{ob}$  values.

Fig 4e demonstrates that risk measures based solely on local within-community predictors are also inadequate. Local reproduction ratio estimates ( $R_{ii}$ ) were consistently lower than  $R^{ob}$ , confirming that local metrics systematically underestimate risk. Moreover, the distinct shapes of the two distributions indicate that  $R^{ob}$  is not merely a scalar multiple of local risk; crucially, the rank ordering of communities changes when spatial coupling is considered.

To further quantify the discrepancy between local risk estimates and  $R^{ob}$ , we defined the local error as the relative increase in the estimated reproduction ratio obtained by using  $R^{ob}$  instead of a local metric. Here, local risk was measured by  $R_{ii}$ , the reproduction ratio accounting only for infections generated within the same community (see Methods). In Figs A–C in S1 Appendix, we also evaluate  $R^{tot}$ , which includes all secondary infections generated by local cases, as an alternative local metric, obtaining similar results.

Fig 5a shows that local errors were systematically lower in urban areas and substantially higher in rural and low-population-density settings, across all values of the reproduction ratio considered. This indicates that in high-density environments local transmission potential is a relatively accurate proxy for epidemic risk, whereas in low-density settings epidemic risk is driven to a larger extent by spatial coupling and network-mediated transmission.

There were, however, exceptions to this pattern, particularly among low- and lower-middle-income countries (Fig 5b), where local errors remained largely uniform across urbanisation levels. This is consistent with what previously found in across African countries where mobility-driven epidemic risk was found to be substantial across diseases and transmission routes, from malaria [48], to HIV [36], to COVID-19 [49]. Among upper-middle-income countries, South Africa emerged as an outlier: local errors were comparatively low in both highly urban and highly rural settings, and instead peaked at intermediate levels of urbanisation.

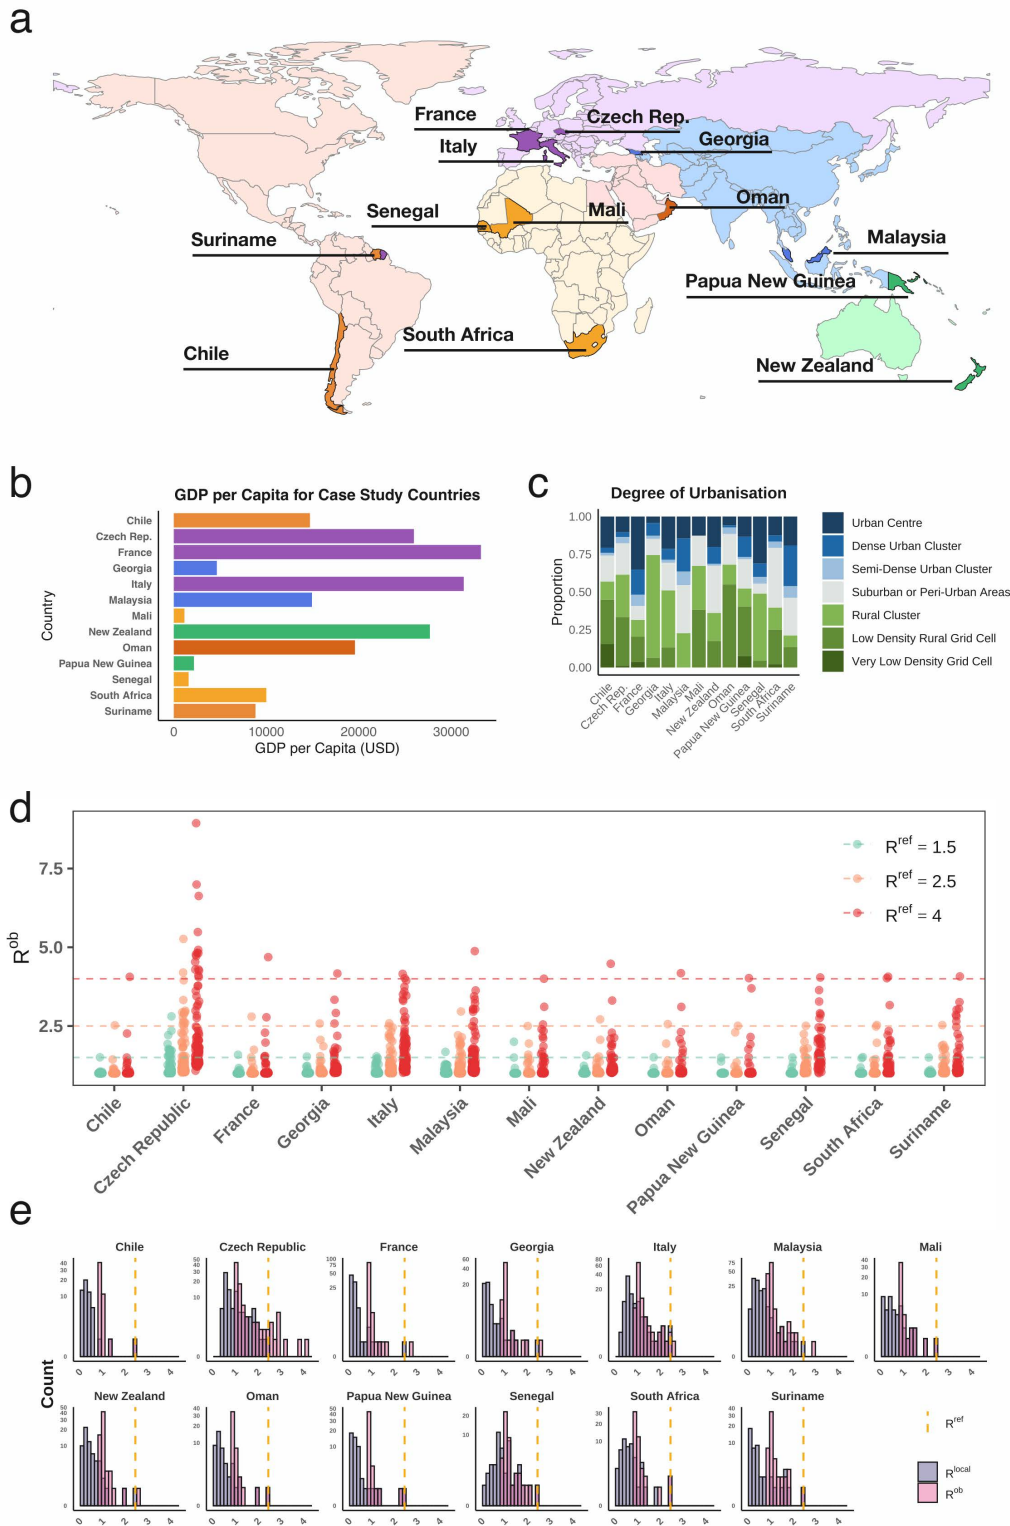

**Fig 4. Pre-outbreak estimate of  $R^{ob}$  across countries, urbanization and income levels using spatial contact data.** **a.** Countries included in the study, representing different WHO regions. Base map data are from Natural Earth (<https://www.naturalearthdata.com>), which are in the public domain and free of copyright restrictions. **b.** GDP per capita of the selected countries in USD in 2022. **c.** Urbanization breakdown for each country categorized according to the Degree of Urbanisation (DEGURBA) classification of its ADMIN-2 areas. **d.** Distribution of  $R^{ob}$  for all ADMIN-2 spatial communities within

each country under three scenarios:  $R^{\text{ref}} = 1.5, 2.5, 4.0$ . Each dot represents a community. **e.** Histograms comparing the distributions of the local reproduction number ( $R_{ii}$ , grey bars) and  $R^{\text{ob}}$  (purple bars) for a scenario where  $R^{\text{ref}} = 2.5$  (dashed orange line).

<https://doi.org/10.1371/journal.pcbi.1014425.g004>

## Application to early SARS-CoV-2 transmission in Canada

We estimated  $R^{\text{ob}}$  of early COVID-19 (March to May 2020) across Canadian provinces using available estimated SARS-CoV-2 transmission chains from phylogenetic data [50]. We included eight Canadian provinces for which data were available: Alberta, British Columbia, Manitoba, New Brunswick, Newfoundland and Labrador, Nova Scotia, Ontario, Québec. We also incorporated available colocation data as priors on the inter-community contact network to mitigate the effects of sparsity in the observed transmission chains (see Methods). Estimates of  $R^{\text{ref}}$  were mildly sensitive to the depth of the considered transmission chains but remained compatible with those reported in previous studies [51,52] (Fig 6a).

Province-specific estimates of  $R^{\text{ob}}$  were close to the threshold value  $R = 1$  in seven of the eight provinces (Fig 6b), indicating a low probability that infections there would generate large-scale transmission. Québec was the sole exception, with  $R^{\text{ob}}$  consistently exceeding 2, identifying it as the primary contributor to epidemic risk in Canada. Notably, this result is consistent with retrospective reconstructions of the effective reproduction number ( $R_t$ ), which identified Québec as the only province sustaining persistent high-level transmission during the first wave of COVID-19 [51,52].

## Discussion

Our study addressed the problem of quantifying epidemic outbreak risk in spatially structured populations before and during the early phase of spread. Epidemic risk is often synthesized through the reproduction ratio, which is easily interpretable and underpins both theoretical understanding and operational decision-making across pathogens, settings, and intervention contexts. In spatially structured systems, however, epidemic dynamics are shaped by the interplay between local transmission and mobility-mediated coupling across communities. Standard reproduction ratios, whether defined locally or at the system level, capture only partial aspects of this interplay and may therefore provide a distorted picture of outbreak risk following pathogen emergence or introduction. Specifically, local measures, such as those recently used to assess arboviral epidemic risk [9], neglect the contribution of mobility-driven transmission beyond the community of emergence, while system-level measures, such as those used for national-scale analyses of COVID-19 transmission in Italy [39], are insensitive to the initial conditions of the outbreak, despite the fact that early epidemic dynamics are strongly influenced by stochastic effects and by the location of introduction. A common way to address these limitations has been to rely on large-scale, data-driven computational models that explicitly represent contact networks and high-resolution (possibly individual-level) transmission. These approaches can reproduce realistic epidemic trajectories, but they are data intensive, require extensive parametrization, and typically move away from synthetic and interpretable risk indicators, often foregoing reproduction-ratio-based metrics altogether [41], in favor of more complex and context-specific simulation-based assessments of epidemic potential [40,53]. The results presented here overcome these limitations in the form of the outbreak reproduction ratio  $R^{\text{ob}}$ , a parsimonious and interpretable reformulation of the reproduction ratio that integrates local transmission conditions with system-level spatial interactions.

The central result is that outbreak risk following an introduction in a given community cannot, in general, be inferred from the expected number of secondary infections generated locally or in total. Instead, it depends on where those infections occur and on the capacity of the recipient communities to sustain onward transmission. The outbreak reproduction ratio makes this dependence mathematically and operationally explicit using the framework of multitype branching processes. In this sense,  $R^{\text{ob}}$  is neither a purely local nor a system-level indicator: it is a community-specific measure that embeds local transmission conditions within the system-wide structure encoded in the underlying spatial contact network. This formulation clarifies why both local and global reproduction ratios may lead to systematic mischaracterizations of

a

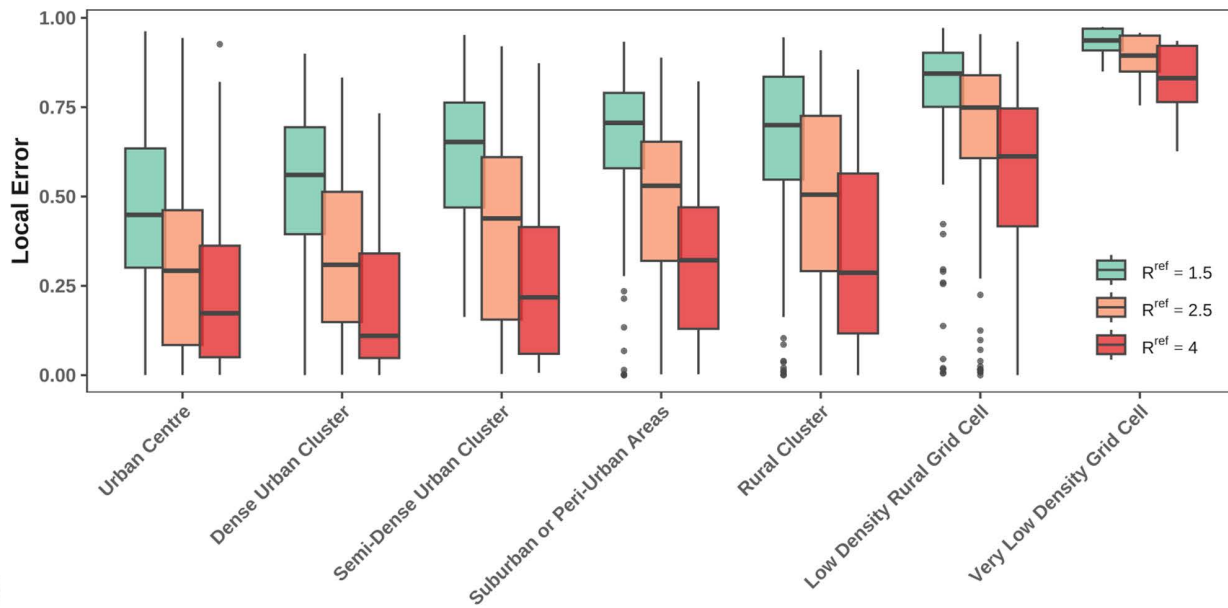

b

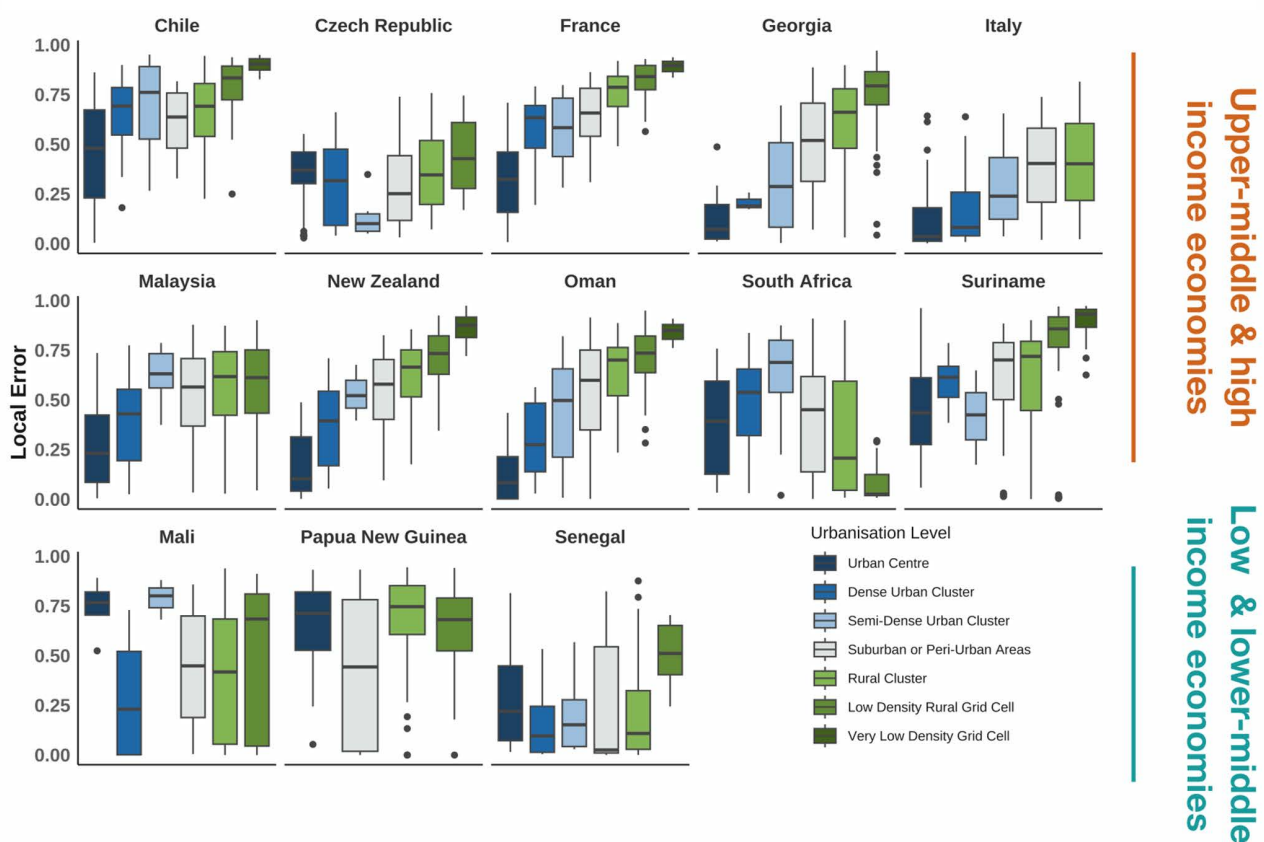

**Fig 5. Discrepancy between local  $R$  and  $R^{ob}$  across countries.** a. Relative local error (defined as the normalized difference between  $R^{ob}$  and  $R_i$ ) stratified by urbanisation level for  $R^{ref} = 1.5, 2.5, 4.0$ . b. Local error in each country (stratified by country income group) across DEGURBA classes of urbanization.

<https://doi.org/10.1371/journal.pcbi.1014425.g005>

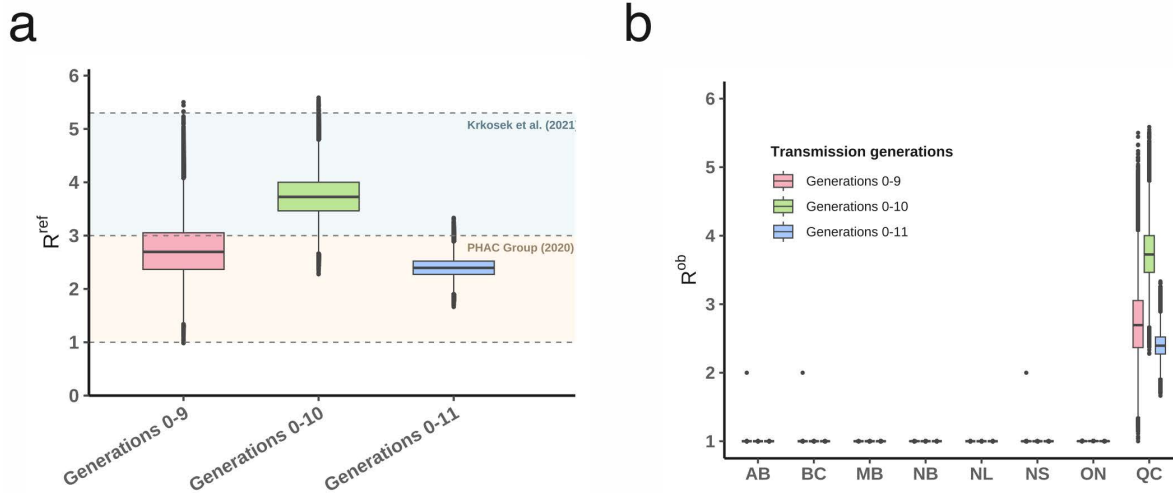

**Fig 6. Retrospective analysis of early SARS-CoV-2 transmission in Canada.** **a.** Estimates of the reference reproduction ratio ( $R^{ref}$ ) inferred from transmission trees (reconstructed from phylogenetic data), truncated at different generations 9, 10 and 11. Colored shaded regions indicate 95% uncertainty intervals of  $R^{ref}$  estimates from previous literature [51,52]. **b.** Estimates of  $R^{ob}$  in the eight Canadian provinces for which data were available. Box plots show the 95% uncertainty posterior estimates across different data subsets. Province abbreviations: AB, Alberta; BC, British Columbia; MB, Manitoba; NB, New Brunswick; NL, Newfoundland and Labrador; NS, Nova Scotia; ON, Ontario; QC, Quebec.

<https://doi.org/10.1371/journal.pcbi.1014425.g006>

epidemic risk. A community with subcritical local transmission, for example, may nonetheless present a non-negligible probability of triggering a large-scale epidemic if it is connected to highly vulnerable parts of the system. The analytical properties of  $R^{ob}$  reflect this structure. It reduces to the standard local reproduction ratio in the absence of spatial coupling, and to the reference (global) reproduction ratio when transmission potential spatially is homogeneous, while in heterogeneous systems it naturally distributes around the system-level value, identifying communities that are structurally more or less likely to act as epidemic triggers.

The empirical analyses presented in this study illustrate the practical consequences of these properties. First, they showed that  $R^{ob}$  can be estimated prior to pathogen emergence or introduction using aggregated large-scale contact and mobility data. Such data, including those from Meta used here, are anonymized and widely available, enabling a privacy-preserving, lightweight, and interpretable characterization of spatially resolved epidemic risk, including in resource-constrained settings with limited data penetration and computational resources. Second, they presented a rich and heterogeneous phenomenology of epidemic risk. Across multiple countries and transmission scenarios for directly-transmitted respiratory pathogens,  $R^{ob}$  revealed substantial heterogeneity that neither local nor system-level metrics could capture. In particular, the discrepancy between local reproduction ratios and outbreak reproduction ratios was modulated by spatial connectivity and urbanicity, exhibiting different patterns among higher- and lower-income countries.

Our results showed that  $R^{ob}$  can be estimated also after introduction or emergence have occurred, from early outbreak surveillance data, although the precision of these estimates depends on both outbreak size and configuration of the spatial contact network. Analysis of simulated epidemic data showed that  $R^{ob}$  estimates are most reliable for the seeding community and for communities that are strongly connected to it, consistent with the concentration of early infections along dominant transmission routes. Then, the retrospective application of  $R^{ob}$  to real phylogenetic data describing early SARS-CoV-2 transmission in Canada illustrated how  $R^{ob}$  can correctly identify local epidemic potential even from during early epidemic phases.

Our findings present the outbreak reproduction ratio  $R^{ob}$  as a natural extension of the reproduction ratio concept to spatially structured populations. Rather than replacing existing indicators,  $R^{ob}$  provides a complementary quantity that

explicitly encodes the contribution of spatial coupling to local outbreak risk. Its definition is independent of disease-specific natural history assumptions and relies on the reproduction operator as a unifying object, making it applicable across transmission routes and epidemiological contexts, provided that the data required to parametrize it are available [15]

This study has limitations. First, the estimation of  $R^{ob}$  is only as reliable as the data used to construct it. Estimates based on surveillance data are sensitive to reporting delays, underdetection, and spatially heterogeneous ascertainment, while estimates based on spatial contact data depend on assumptions linking observed proximity to effective transmission. Colocation data, in particular, provide an aggregate proxy for mixing and may suffer from representativeness bias [54]. These limitations directly propagate to  $R^{ob}$  and must be accounted for when interpreting quantitative values. Second, the theoretical framework does not include explicit overdispersion in secondary infections. Offspring distributions are assumed to be Poisson, with heterogeneity arising from population structure [20–22,43,55]. While this is enough to account for many sources of heterogeneity that are typically effectively modeled with overdispersed distributions, it does not account for individual-level variations in contact patterns and transmissibility or susceptibility profiles [25,27,43,56,57]. Third, the analysis relies on a linear approximation in which the reproduction operator is effectively constant. This approximation is appropriate for the early phase of an outbreak or for periods without major changes in immunity, behavior, or interventions, but it is not intended to describe later epidemic phases where such feedbacks substantially alter transmission [58]. Lastly, the choice of spatial resolution may affect risk estimates. Our framework is formally agnostic to the level of aggregation, but the reliability and operational relevance of the resulting estimates inevitably depend on the granularity and quality of the available data. Future studies should be devoted to assessing this effect in specific public health settings, however we provided here a preliminary assessment using Italy as a case study (Fig E in S1 Appendix), showing that in some cases spatial aggregation may not only mask heterogeneities in epidemic risk, but also bias aggregated risk estimates.

## Conclusion

This work introduces an analytical and interpretable framework for quantifying epidemic risk in spatially structured populations. The outbreak reproduction ratio  $R^{ob}$  reformulates the reproduction ratio to explicitly account for spatial coupling, and provides a lightweight, generalizable, and locally resolved yet system-aware indicator of epidemic risk that remains tied to established epidemiological concepts. This approach enables spatially resolved risk assessment using readily available data and relying on very limited computational resources, clarifying the conditions under which standard metrics fail to capture the mechanisms governing early epidemic spread, and how those limitations can be overcome.

## Materials and methods

### Multi-type branching process

Let  $X_{i \rightarrow j}$  be the number of secondary infections that an infected resident of  $i$  generates in  $j$ . By definition of the reproduction operator,  $\mathbb{E}[X_{i \rightarrow j}] = R_{ji}$ . Let  $p_i$  be the previously defined epidemic probability, i.e., the probability that a realization of the multitype branching process starting with one initial case in  $i$  does not go extinct. These probabilities obey the following equation (Ref. [42]):

$$p_i = 1 - G_i(\mathbf{1} - \vec{p}), \tag{4}$$

where  $\vec{p}$  is the vector of all  $p_i$ s, and  $G_i$  is the multivalued probability-generating function of the stochastic vector  $\vec{X}_i$ , encoding the number of secondary infections from a resident of  $i$  to every community:  $\vec{X}_i = (X_{i \rightarrow 1}, \dots, X_{i \rightarrow N})$ .

Let us assume that  $X_{i \rightarrow j}$  are distributed as a negative binomial and that  $X_{i \rightarrow j}, X_{k \rightarrow l}$  are independent unless  $i=j$  and  $k=l$ . Recalling that the probability generating function of the negative binomial distribution with mean  $r$  and overdispersion parameter  $\omega$  – so that  $\mathbb{E}[X_{i \rightarrow j}] = R_{ji}$  and  $\text{Var}[X_{i \rightarrow j}] = R_{ji}(1 + \omega R_{ji})$  – is  $g(z|R_{ji}, \omega) = [1 + \omega R_{ji}(1 - z)]^{-1/\omega}$ , we can compute the probability-generating function in Eq. (4), leading to

$$p_i = 1 - \prod_j [1 + \omega R_{ij} \rho_j]^{-1/\omega}. \quad (5)$$

In the limiting case of no overdispersion ( $\omega = 0$ ) one gets the Poisson distribution:  $\lim_{\omega \rightarrow 0} g(z | r, \omega) = e^{r(z-1)}$

$$p_i = 1 - \prod_j e^{-R_{ij} \rho_j}, \quad (6)$$

and thus [Eq. \(1\)](#).

### Spatial contact data to model the reproduction operator

We estimated the reproduction operator  $\mathbf{R}$  using Colocation Maps provided by Meta Data For Good [54]. Colocation Maps use the probability, computed from mobile device usage, that a randomly chosen resident of community  $i$  and a randomly chosen resident of community  $j$  find themselves in the same  $600\text{ m} \times 600\text{ m}$  tile during a randomly chosen five-minute time window. The data were provided at the ADM 2 level and for week 13 of 2023. We combined Colocation Maps with population data and built the reproduction operator (up to a constant), following what we had done in Ref. [15]. Specifically, with  $C_{ij}$  being the colocation rate provided by Meta and  $n_i$  the population of spatial communities, then  $R_{ij} \propto C_{ij} n_i$ . The arbitrary multiplication constant was then used to set the reference reproduction ratio  $R^{\text{ref}}$ , i.e., the spectral radius of  $\mathbf{R}$ .

### $R^{\text{ob}}$ as a function of the epidemic probabilities

Our first goal is to compute  $P(\vec{X}_i | \text{epidemic})$ , which will then be used to compute the expectation values in [Eq. \(2\)](#). We use Bayes' theorem:

$$P(\vec{X}_i | \text{epidemic}) = \frac{P(\text{epidemic} | \vec{X}_i) P(\vec{X}_i)}{P(\text{epidemic})}, \quad (7)$$

and then compute each term:

$$P(\text{epidemic}) = p_i; \quad (8)$$

$$P(\vec{X}_i) = \prod_j f(X_{i \rightarrow j} | R_{ji}); \quad (9)$$

$$P(\text{epidemic} | \vec{X}_i) = 1 - \prod_j (1 - p_j)^{X_{i \rightarrow j}}. \quad (10)$$

Here,  $f(X_{i \rightarrow j} | R_{ji})$  is the probability mass function of a Poisson distribution with mean  $R_{ji}$ . The term  $P(\text{epidemic} | \vec{X}_i)$  is the probability that at least one of the secondary infections triggers a large-scale epidemic. This gives

$$P(\vec{X}_i | \text{epidemic}) = \frac{1}{p_i} \left[ 1 - \prod_j (1 - p_j)^{X_{i \rightarrow j}} \right] \prod_j f(X_{i \rightarrow j} | R_{ji}). \quad (11)$$

For brevity, we define the following expectation values:  $E_{ij}^+ = \mathbb{E}[X_{i \rightarrow j} | \text{epidemic}]$  and  $E_{ij}^- = \mathbb{E}[X_{i \rightarrow j} | \text{extinction}]$ . We can use [Eq. \(11\)](#) to compute the former:

$$E_{ij}^+ = \frac{1}{\rho_i} \left\{ \mathbb{E}[X_{i \rightarrow j}] + \right. \tag{12}$$

$$\left. - \left[ \prod_{k \neq j} f(X_{i \rightarrow k} | R_{ki}) (1 - \rho_k)^{X_{i \rightarrow k}} \right] \sum_{X_{i \rightarrow j}=0}^{\infty} f(X_{i \rightarrow j} | R_{ji}) (1 - \rho_j)^{X_{i \rightarrow j}} X_{i \rightarrow j} \right\} = \tag{13}$$

$$= \frac{1}{\rho_i} \left\{ R_{ji} - \left[ \prod_{k \neq j} g(1 - \rho_k | R_{ki}) \right] (1 - \rho_j) g'(1 - \rho_j | R_{ji}) \right\} \tag{14}$$

Calculations up to now hold for a generic distribution of secondary infections  $f$ , and we have also used that  $\sum_X f(X|r) X z^X = z g'(z|r)$ , with  $g$  being the probability-generating function of  $f$ . From now on we assume that secondary infections are Poisson-distributed ( $g(z|r) = e^{r(z-1)}$ ). The derivation of the general case with overdispersed secondary infections is reported in [S1 Appendix](#).

$$E_{ij}^+ = \frac{R_{ji}}{\rho_i} \left\{ 1 - (1 - \rho_j) \left[ \prod_k g(1 - \rho_k | R_{ki}) \right] \right\} = \tag{15}$$

$$= R_{ji} + \frac{1 - \rho_i}{\rho_i} R_{ji} \rho_j. \tag{16}$$

In [Eq. \(15\)](#) we have used that  $\sum_X f(X|r) X z^X = z r g'(z|r)$ , and in [Eq. \(16\)](#) we have used [Eq. \(1\)](#). From the identity

$$P(X_{i \rightarrow j}) = \rho_i P(X_{i \rightarrow j} | \text{epidemic}) + (1 - \rho_i) P(X_{i \rightarrow j} | \text{extinction}) \tag{17}$$

one derives

$$R_{ji} = \rho_i E_{ij}^+ + (1 - \rho_i) E_{ij}^-, \tag{18}$$

which, combined with [Eq. \(16\)](#), one can derive

$$E_{ij}^- = R_{ji} - R_{ji} \rho_j. \tag{19}$$

The difference between [Eqs. \(16\)](#) and [\(19\)](#), summed over  $j$ , proves the second expression in [Eq. \(2\)](#). The first expression is then also recovered simply by replacing  $\sum_j R_{ji} \rho_j = -\log(1 - \rho_i)$ , which comes from [Eq. \(1\)](#).

In [S1 Appendix](#), we report the expression of  $R^{\text{ob}}$  in the case of nonzero overdispersion, showing that overdispersion has the effect of increasing  $R^{\text{ob}}$ , compatible with the well-known impact of heterogeneity on epidemic risk [\[25\]](#).

### Homogeneous transmission potential

We wish to prove that the total reproduction ratio of each community is the same ( $R_i^{\text{tot}} = R^{\text{ref}} \forall i$ ) if and only if  $R_i^{\text{ob}} = R^{\text{ref}} \forall i$ .

First we prove that  $R_i^{\text{tot}} = R^{\text{ref}}$  if and only if  $p_i = p$ , for  $p$  solving  $p = 1 - e^{-R^{\text{ref}}p}$ . If the former is true then  $\mathbf{R}$  is left-stochastic (up to a scalar) and a vector of ones is the Perron eigenvector of  $\mathbf{R}^T$ , and  $R^{\text{ref}}$  is the Perron eigenvalue. This means that Eq. (1) collapses to  $p_i = 1 - e^{-R^{\text{ref}}p_i}$  for all  $i$ , and  $p_i = p$ . If the latter is true then Eq. (1) implies that  $\sum_j R_{ji}p_j = pR_{ji}$ , implying again that a vector of ones is a positive eigenvector of  $\mathbf{R}^T$ . This means that the columns of  $\mathbf{R}$  sum to the same quantity, which must be  $R^{\text{ref}}$  because that eigenvector must be the Perron eigenvector.

Now we prove that if  $R_i^{\text{ob}} = R^{\text{ob}} \forall i$  then  $R^{\text{ob}} = R^{\text{ref}}$ . If the hypothesis is true, Eq. (3) implies that  $\sum_j R_{ji}p_j = R^{\text{ob}}p_i$ . Then  $R^{\text{ob}}$  is the Perron eigenvalue of  $\mathbf{R}^T$  and  $\mathbf{p}$  the Perron eigenvector. Using this in Eq. (1) one gets that  $p_i = p$ . Then, each column of  $\mathbf{R}$  sums to  $R^{\text{ref}}$ , which is also the Perron eigenvalue. Then,  $R^{\text{ob}} = R^{\text{ref}}$ .

Finally, we prove that if the columns of  $\mathbf{R}$  all sum to  $R^{\text{ref}}$  then  $R_i^{\text{ob}} = R^{\text{ref}}$ . If the hypothesis is true then  $p_i = p$  and again  $R^{\text{ob}}$  must be equal to the Perron eigenvalue, by virtue of Eq. (3).

### Continuation of the outbreak reproduction ratio below the system's epidemic threshold

Let  $p_i(t)$  the probability that the epidemic has not died out by generation  $t$ . It obeys the following iterative equation:

$$p_i(t+1) = 1 - \exp \left[ - \sum_j R_{ji} p_j(t) \right]. \quad (20)$$

Its stable, fixed-point solution defines the epidemic probability as in Eq. (1):  $p_i = \lim_{t \rightarrow \infty} p_i(t)$  [42]. Also, let us assume  $\mathbf{R}$  is nonnegative and irreducible, i.e., it is interpretable as the adjacency matrix of a strongly connected directed graph, so that Perron-Frobenius theory applies. If this were not the case the analysis could be performed separately on each strongly connected component [15]. Below the epidemic threshold ( $R^{\text{ref}} < 1$ ),  $p_i = 0 \forall i$ , preventing from finding  $R^{\text{ob}}$  directly from Eq. (3) in that regime. We will use the time evolution to perform a continuation of the outbreak reproduction ratio to below the epidemic threshold. Eq. (3) can be trivially written as follows:

$$R_i^{\text{ob}} = \frac{\sum_j R_{ji} \lim_{t \rightarrow \infty} p_j(t)}{\lim_{t \rightarrow \infty} p_i(t)}. \quad (21)$$

The continuation consists in replacing this with the following equation, swapping the time limit and the computation of the outbreak reproduction ratio:

$$R_i^{\text{ob}} = \lim_{t \rightarrow \infty} \frac{\sum_j R_{ji} p_j(t)}{p_i(t)}. \quad (22)$$

When  $R^{\text{ref}} > 1$  and  $p_i > 0$  the two expressions are trivially identical and we can use the latter to go to  $R^{\text{ref}} < 1$ . If  $t$  is large enough,  $p_i(t)$  are small so that we can linearize Eq. (20) around the fixed-point solution  $p_i = 0$  (we are  $R^{\text{ref}} < 1$ ) keeping  $\mathcal{O}(p_i(t))$ :

$$p_i(t+1) \approx \sum_j R_{ji} p_j(t). \quad (23)$$

$$\mathbf{p}(t+t_0) \approx (\mathbf{R}^T)^{t_0} \mathbf{p}(t_0), \quad (24)$$

for some  $t_0$ . Let us now define  $\mathbf{v}$  as the right Perron eigenvector of  $\mathbf{R}$  and  $\mathbf{v}^*$  is dual vector (left Perron eigenvector), normalized so that  $\mathbf{v}^* \mathbf{v} = 1$ . Then, if  $t$  is large enough, Perron-Frobenius theory states that  $(\mathbf{R}^T)^t \approx (R^{\text{ref}})^t \mathbf{v}^T \mathbf{v}^{*T}$ , with  $\mathbf{a}, \mathbf{b}$  right and left Perron eigenvectors of  $\mathbf{R}^T$  and  $\mathbf{b}^T \mathbf{a} = 1$ . Inserting into Eq. (24), one gets

$$p_i(t) \approx c(t) v_i^*, \tag{25}$$

where  $c(t)$  is some scalar with  $c(\infty) = 0$ . This relegates the time dependence to a scalar prefactor, and the limit in Eq. (22) can now be performed.

$$R_i^{\text{ob}} = \lim_{t \rightarrow \infty} \frac{c(t) \sum_j R_{ji} v_j^*}{c(t) v_i^*} = \frac{(\mathbf{v}^* \mathbf{R})_i}{v_i^*} = R^{\text{ref}} \frac{v_i^*}{v_i^*} = R^{\text{ref}}. \tag{26}$$

### Stochastic, spatially explicit epidemic model

To validate the equivalence between Eq. (2) (the definition of the outbreak reproduction ratio) and Eq. (3) (its expression in terms of epidemic probability), we simulated the early phase of an epidemic by sampling from the multitype branching process. We used Colocation Maps from Italy to inform  $\mathbf{R}$ , as previously explained.

First, we computed  $p_i$  by numerically solving Eq. (1) and then computed  $R^{\text{ob}}$  from Eq. (3). For each spatial community  $i$ , we ran 100,000 simulations started with one infected individual in  $i$ . We ran each simulation to extinction or upon reaching a cutoff epidemic size  $M$ . Simulation outcomes were classified as either *epidemic*, if the outbreak size exceeded the cutoff, or *extinction*, if it did not. From those, we computed  $\mathbb{E}[\sum_k X_{i \rightarrow k} | \text{epidemic}]$  and  $\mathbb{E}[\sum_k X_{i \rightarrow k} | \text{extinction}]$  as empirical means and estimated  $R^{\text{ob}}$  from Eq. (2).

### Estimating the outbreak reproduction ratio from outbreak data

To estimate  $R^{\text{ob}}$  using data from a single outbreak, we first infer  $\mathbf{R}$  from  $T+1$  generations of the branching process ( $t = 0, \dots, T$ ). Let  $Y_{i \rightarrow j}(t)$  be the observed number of infections in  $j$  at time step  $t$  generated by residents of  $i$ , and let  $I_i(t) = \sum_j Y_{j \rightarrow i}(t)$  be the number of incident infections in  $i$  at time step  $t$ . We know that  $Y_{i \rightarrow j}(t)$  is Poisson-distributed with mean equal to  $I_i(t-1)R_{ji}$ , and that generation along different links is independent. This gives the following likelihood:

$$L = \prod_{t=1}^T \prod_{ij} \frac{e^{-I_i(t-1)R_{ji}}}{Y_{i \rightarrow j}(t)!} [I_i(t-1)R_{ji}]^{Y_{i \rightarrow j}(t)} \propto \prod_{ij} R_{ji}^{S_{ij}} e^{-E_j R_{ji}} \tag{27}$$

$$S_{ij} = \sum_{t=1}^T Y_{i \rightarrow j}(t), \tag{28}$$

$$E_j = \sum_{t=1}^T I_j(t-1). \tag{29}$$

where we introduced the sufficient statistics  $S_{ij}, E_j$ . The likelihood thus factorizes into a product of Gamma-distributed  $R_{ji}$  with shape  $\alpha_{ij} = S_{ij} + 1$  and rate  $\beta_{ij} = E_j$ , leading to the maximum-likelihood estimator of  $R_{ji}$  (see also Ref. [59]):

$$\hat{R}_{ij} = \frac{\alpha_{ij}}{\beta_{ij}} = \frac{S_{ij}}{E_j}. \quad (30)$$

Then, by sampling from the Gamma distributions of the individual  $R_{ij}$  entries and computing  $R^{\text{ob}}$  through [Eqs. \(1\)](#) and [\(3\)](#) for each sample, we reconstructed the empirical distribution of the outbreak reproduction ratios.

In addition, it is interesting to study how the uncertainty on  $R_{ij}$  evolves with the available data:

$$\text{VAR}[R_{ij}] = \frac{S_{ij} + 1}{E_j^2} \approx \frac{\hat{R}_{ij}}{E_j}. \quad (31)$$

At large enough  $T$ ,  $\mathbb{E}[I_i(t)] \approx [\mathbf{v}^* \mathbf{I}(0)] (R^{\text{ref}})^t v_i$ . Assuming that the initial infection is in community  $i_0$ , this means  $\mathbb{E}[I_i(t)] = (R^{\text{ref}})^t v_{i_0}^* v_i$ . This implies that, at large  $T$ ,

$$\text{VAR}[R_{ij}] \approx \frac{\hat{R}_{ij}}{(R^{\text{ref}})^T v_{i_0}^* v_j}. \quad (32)$$

This implies that the precision at which we can estimate  $R_{ij}$  i) increases with the depth of the transmission chain that we observe, ii) is higher in the communities where the asymptotic equilibrium distribution of infections (see Ref. [\[15\]](#)) is concentrated, iii) is higher if seeding occurs where the dual equilibrium distribution is concentrated.

### Geography of risk estimates

Our analysis included Chile, the Czech Republic, France, Georgia, Italy, Mali, Malaysia, New Zealand, Oman, Papua New Guinea, Senegal, Suriname, and South Africa, spanning different continents and income levels.

To identify structural factors driving discrepancies between  $R^{\text{ob}}$  and naive risk estimates, we considered the following relative discrepancies:

$$\text{local error} = \frac{R_i^{\text{ob}} - R_{ij}}{R_i^{\text{ob}}}; \quad (33)$$

$$\text{total error} = \frac{R_i^{\text{ob}} - R_i^{\text{tot}}}{R_i^{\text{ob}}}. \quad (34)$$

The analysis with *local error* is reported in the main text, whereas the analysis based on *total error* is reported in Figs A–C in [S1 Appendix](#).

### Inference from transmission trees in Canada

We analyzed transmission trees inferred from SARS-CoV-2 genomic sequences collected in Canada between March and May 2020, covering generations 0–11 of transmission [\[50\]](#). To link these trees (where communities are defined at the provincial level) to the spatially explicit framework developed above, we adopted a hybrid inference scheme in which the spatial structure is fixed by contact data and only the overall transmission intensity is inferred.

We used the normalized collocation matrix  $\mathbf{M}$  derived from Meta Colocation Maps, with entries  $M_{ij} \propto C_{ij} n_i$  and spectral radius  $\rho(\mathbf{M}) = 1$  (see Spatial contact data in the Methods). We assumed the reproduction operator takes the form  $\mathbf{R} = R^{\text{ref}} \mathbf{M}$ , where  $R^{\text{ref}}$  is a scalar reference reproduction ratio. Under this parametrization, the Poisson likelihood in

Eq. (27) simplifies to a one-parameter model in  $R^{\text{ref}}$ , utilizing the sufficient statistics  $S_{ij}$  and  $E_i$  derived from the transmission trees (see Eqs. (28)–(29)). We assigned a flat prior to  $R^{\text{ref}}$  (uniform over positive real values) and sampled from the posterior distribution using Markov Chain Monte Carlo in Stan [60]. For each posterior draw, we reconstructed  $\mathbf{R}$ , solved Eq. (1) for the epidemic probabilities  $p_i$ , and computed  $R^{\text{ob}}$  via Eq. (3). The procedure was repeated after truncating the trees at generations 0–9 and 0–10 to assess the robustness of estimates to chain depth.

## Supporting information

**S1 Appendix. Supplementary information.** This appendix contains the supplementary figures and methods. Fig A, Comparison of total and outbreak reproduction ratios. Fig B, Total error in risk estimation linked to urbanisation. Fig C, Total error stratified by country. Fig D, Numerical validation of epidemic probability estimates. Fig E, Effect of spatial aggregation on  $R^{\text{ob}}$  estimates by comparing ADM-1 and ADM-2 spatial resolutions in Italy. Fig F, Numerical validation under overdispersed secondary infections. Fig G, Sensitivity of  $R^{\text{ob}}$  to random noise and systematic bias in spatial contact data in Italy. Supplementary Methods include numerical validation of epidemic probability estimates, analytical derivation of  $R^{\text{ob}}$  for overdispersed secondary infections, and analytical derivation of non-exponential infectious periods.

(PDF)

## Acknowledgments

Colocation Maps data were available thanks to AI For Good at Meta.

## Author contributions

**Conceptualization:** Boxuan Wang, Eugenio Valdano.

**Data curation:** Boxuan Wang.

**Formal analysis:** Boxuan Wang, Eugenio Valdano.

**Funding acquisition:** Eugenio Valdano.

**Investigation:** Boxuan Wang, Eugenio Valdano.

**Methodology:** Boxuan Wang, Eugenio Valdano.

**Project administration:** Eugenio Valdano.

**Resources:** Eugenio Valdano.

**Software:** Boxuan Wang.

**Supervision:** Eugenio Valdano.

**Validation:** Boxuan Wang, Eugenio Valdano.

**Visualization:** Boxuan Wang.

**Writing – original draft:** Boxuan Wang, Eugenio Valdano.

**Writing – review & editing:** Boxuan Wang, Eugenio Valdano.

## References

1. Board GPM. A World at Risk: Annual Report on Global Preparedness for Health Emergencies. Geneva: World Health Organization. 2019. <https://www.gpmb.org/reports/m/item/2019-a-world-at-risk>
2. Keeling MJ, Rohani P. Modeling Infectious Diseases in Humans and Animals. Princeton, NJ, USA: Princeton University Press. 2007.
3. Southall E, Ogi-Gittins Z, Kaye AR, Hart WS, Lovell-Read FA, Thompson RN. A practical guide to mathematical methods for estimating infectious disease outbreak risks. J Theor Biol. 2023;562:111417. <https://doi.org/10.1016/j.jtbi.2023.111417> PMID: 36682408

4. Anderson RM, May RM. *Infectious Diseases of Humans: Dynamics and Control*. Oxford, UK: OUP. 1992.
5. Van Kerkhove MD, Bento AI, Mills HL, Ferguson NM, Donnelly CA. A review of epidemiological parameters from Ebola outbreaks to inform early public health decision-making. *Sci Data*. 2015;2:150019. <https://doi.org/10.1038/sdata.2015.19> PMID: [26029377](https://pubmed.ncbi.nlm.nih.gov/26029377/)
6. Li Q, Guan X, Wu P, Wang X, Zhou L, Tong Y, et al. Early Transmission Dynamics in Wuhan, China, of Novel Coronavirus-Infected Pneumonia. *N Engl J Med*. 2020;382(13):1199–207. <https://doi.org/10.1056/NEJMoa2001316> PMID: [31995857](https://pubmed.ncbi.nlm.nih.gov/31995857/)
7. Pan A, Liu L, Wang C, Guo H, Hao X, Wang Q, et al. Association of Public Health Interventions With the Epidemiology of the COVID-19 Outbreak in Wuhan, China. *JAMA*. 2020;323(19):1915–23. <https://doi.org/10.1001/jama.2020.6130> PMID: [32275295](https://pubmed.ncbi.nlm.nih.gov/32275295/)
8. Nouvellet P, Bhatia S, Cori A, Ainslie KEC, Baguelin M, Bhatt S, et al. Reduction in mobility and COVID-19 transmission. *Nat Commun*. 2021;12(1):1090. <https://doi.org/10.1038/s41467-021-21358-2> PMID: [33597546](https://pubmed.ncbi.nlm.nih.gov/33597546/)
9. Zardini A, Menegale F, Gobbi A, Manica M, Guzzetta G, d'Andrea V, et al. Estimating the potential risk of transmission of arboviruses in the Americas and Europe: a modelling study. *Lancet Planet Health*. 2024;8(1):e30–40. [https://doi.org/10.1016/S2542-5196\(23\)00252-8](https://doi.org/10.1016/S2542-5196(23)00252-8) PMID: [38199719](https://pubmed.ncbi.nlm.nih.gov/38199719/)
10. Wallinga J, Lipsitch M. How generation intervals shape the relationship between growth rates and reproductive numbers. *Proc Biol Sci*. 2007;274(1609):599–604. <https://doi.org/10.1098/rspb.2006.3754> PMID: [17476782](https://pubmed.ncbi.nlm.nih.gov/17476782/)
11. Cori A, Ferguson NM, Fraser C, Cauchemez S. A new framework and software to estimate time-varying reproduction numbers during epidemics. *Am J Epidemiol*. 2013;178(9):1505–12. <https://doi.org/10.1093/aje/kwt133> PMID: [24043437](https://pubmed.ncbi.nlm.nih.gov/24043437/)
12. Gostic KM, McGough L, Baskerville EB, Abbott S, Joshi K, Tedijanto C, et al. Practical considerations for measuring the effective reproductive number, Rt. *PLoS Comput Biol*. 2020;16(12):e1008409. <https://doi.org/10.1371/journal.pcbi.1008409> PMID: [33301457](https://pubmed.ncbi.nlm.nih.gov/33301457/)
13. White LF, Moser CB, Thompson RN, Pagano M. Statistical Estimation of the Reproductive Number From Case Notification Data. *Am J Epidemiol*. 2021;190(4):611–20. <https://doi.org/10.1093/aje/kwaa211> PMID: [33034345](https://pubmed.ncbi.nlm.nih.gov/33034345/)
14. Gressani O, Wallinga J, Althaus CL, Hens N, Faes C. EpiLPS: A fast and flexible Bayesian tool for estimation of the time-varying reproduction number. *PLoS Comput Biol*. 2022;18(10):e1010618. <https://doi.org/10.1371/journal.pcbi.1010618> PMID: [36215319](https://pubmed.ncbi.nlm.nih.gov/36215319/)
15. Birello P, Re Fiorentin M, Wang B, Colizza V, Valdano E. Estimates of the reproduction ratio from epidemic surveillance may be biased in spatially structured populations. *Nat Phys*. 2024;20(7):1204–10. <https://doi.org/10.1038/s41567-024-02471-7>
16. Diekmann O, Heesterbeek JA, Metz JA. On the definition and the computation of the basic reproduction ratio  $R_0$  in models for infectious diseases in heterogeneous populations. *J Math Biol*. 1990;28(4):365–82. <https://doi.org/10.1007/BF00178324> PMID: [2117040](https://pubmed.ncbi.nlm.nih.gov/2117040/)
17. Colizza V, Vespignani A. Invasion threshold in heterogeneous metapopulation networks. *Phys Rev Lett*. 2007;99(14):148701. <https://doi.org/10.1103/PhysRevLett.99.148701> PMID: [17930732](https://pubmed.ncbi.nlm.nih.gov/17930732/)
18. Diekmann O, Heesterbeek JAP, Roberts MG. The construction of next-generation matrices for compartmental epidemic models. *J R Soc Interface*. 2010;7(47):873–85. <https://doi.org/10.1098/rsif.2009.0386> PMID: [19892718](https://pubmed.ncbi.nlm.nih.gov/19892718/)
19. Pastor-Satorras R, Castellano C, Van Mieghem P, Vespignani A. Epidemic processes in complex networks. *Rev Mod Phys*. 2015;87(3):925–79. <https://doi.org/10.1103/revmodphys.87.925>
20. Manna A, Dall'Amico L, Tizzoni M, Karsai M, Perra N. Generalized contact matrices allow integrating socioeconomic variables into epidemic models. *Sci Adv*. 2024;10(41):eadk4606. <https://doi.org/10.1126/sciadv.adk4606> PMID: [39392883](https://pubmed.ncbi.nlm.nih.gov/39392883/)
21. Angeli L, Caetano CP, Franco N, Coletti P, Faes C, Molenberghs G, et al. Assessing the role of children in the COVID-19 pandemic in Belgium using perturbation analysis. *Nat Commun*. 2025;16(1):2230. <https://doi.org/10.1038/s41467-025-57087-z> PMID: [40044649](https://pubmed.ncbi.nlm.nih.gov/40044649/)
22. Tran-Kiem C, Bedford T. Estimating the reproduction number and transmission heterogeneity from the size distribution of clusters of identical pathogen sequences. *Proc Natl Acad Sci U S A*. 2024;121(15):e2305299121. <https://doi.org/10.1073/pnas.2305299121> PMID: [38568971](https://pubmed.ncbi.nlm.nih.gov/38568971/)
23. Nishiura H, Yan P, Sleeman CK, Mode CJ. Estimating the transmission potential of supercritical processes based on the final size distribution of minor outbreaks. *J Theor Biol*. 2012;294:48–55. <https://doi.org/10.1016/j.jtbi.2011.10.039> PMID: [22079419](https://pubmed.ncbi.nlm.nih.gov/22079419/)
24. Hindes J, Assaf M, Schwartz IB. Outbreak Size Distribution in Stochastic Epidemic Models. *Phys Rev Lett*. 2022;128(7):078301. <https://doi.org/10.1103/PhysRevLett.128.078301> PMID: [35244445](https://pubmed.ncbi.nlm.nih.gov/35244445/)
25. Lloyd-Smith JO, Schreiber SJ, Kopp PE, Getz WM. Superspreading and the effect of individual variation on disease emergence. *Nature*. 2005;438(7066):355–9. <https://doi.org/10.1038/nature04153> PMID: [16292310](https://pubmed.ncbi.nlm.nih.gov/16292310/)
26. Viboud C, Simonsen L, Chowell G. A generalized-growth model to characterize the early ascending phase of infectious disease outbreaks. *Epidemics*. 2016;15:27–37. <https://doi.org/10.1016/j.epidem.2016.01.002> PMID: [27266847](https://pubmed.ncbi.nlm.nih.gov/27266847/)
27. Adam DC, Wu P, Wong JY, Lau EHY, Tsang TK, Cauchemez S, et al. Clustering and superspreading potential of SARS-CoV-2 infections in Hong Kong. *Nat Med*. 2020;26(11):1714–9. <https://doi.org/10.1038/s41591-020-1092-0> PMID: [32943787](https://pubmed.ncbi.nlm.nih.gov/32943787/)
28. Flaxman S, Mishra S, Gandy A, Unwin HJT, Mellan TA, Coupland H, et al. Estimating the effects of non-pharmaceutical interventions on COVID-19 in Europe. *Nature*. 2020;584(7820):257–61. <https://doi.org/10.1038/s41586-020-2405-7> PMID: [32512579](https://pubmed.ncbi.nlm.nih.gov/32512579/)
29. Trevisin C, Bertuzzo E, Pasetto D, Mari L, Miccoli S, Casagrandi R, et al. Spatially explicit effective reproduction numbers from incidence and mobility data. *Proc Natl Acad Sci U S A*. 2023;120(20):e2219816120. <https://doi.org/10.1073/pnas.2219816120> PMID: [37159476](https://pubmed.ncbi.nlm.nih.gov/37159476/)
30. Green W, Ferguson N, Cori A. Inferring the reproduction number using the renewal equation in heterogeneous epidemics. *J R Soc Interface*. 2022;19(188):20210429. <https://doi.org/10.1098/rsif.2021.0429> PMID: [35350879](https://pubmed.ncbi.nlm.nih.gov/35350879/)

31. Nishiura H, Chowell G, Safan M, Castillo-Chavez C. Pros and cons of estimating the reproduction number from early epidemic growth rate of influenza A (H1N1) 2009. *Theoretical Biology and Medical Modelling*. 2010;7(1):1. <https://doi.org/10.1186/1742-4682-7-1>
32. Thompson RN, Stockwin JE, van Gaalen RD, Polonsky JA, Kamvar ZN, Demarsh PA, et al. Improved inference of time-varying reproduction numbers during infectious disease outbreaks. *Epidemics*. 2019;29:100356. <https://doi.org/10.1016/j.epidem.2019.100356> PMID: [31624039](https://pubmed.ncbi.nlm.nih.gov/31624039/)
33. Creswell R, Augustin D, Bouros I, Farm HJ, Miao S, Ahern A, et al. Heterogeneity in the onwards transmission risk between local and imported cases affects practical estimates of the time-dependent reproduction number. *Philos Trans A Math Phys Eng Sci*. 2022;380(2233):20210308. <https://doi.org/10.1098/rsta.2021.0308> PMID: [35965464](https://pubmed.ncbi.nlm.nih.gov/35965464/)
34. Li W, Bulekova K, Gregor B, White LF, Kolaczyk ED. Estimation of local time-varying reproduction numbers in noisy surveillance data. *Philos Trans A Math Phys Eng Sci*. 2022;380(2233):20210303. <https://doi.org/10.1098/rsta.2021.0303> PMID: [35965456](https://pubmed.ncbi.nlm.nih.gov/35965456/)
35. Wesolowski A, Eagle N, Tatem AJ, Smith DL, Noor AM, Snow RW. Quantifying the Impact of Human Mobility on Malaria. *Science*. 2012;338(6104):267–70. <https://doi.org/10.1126/science.1223467>
36. Valdano E, Okano JT, Colizza V, Mitonga HK, Blower S. Using mobile phone data to reveal risk flow networks underlying the HIV epidemic in Namibia. *Nat Commun*. 2021;12(1):2837. <https://doi.org/10.1038/s41467-021-23051-w> PMID: [33990578](https://pubmed.ncbi.nlm.nih.gov/33990578/)
37. Poletto C, Boëlle P-Y, Colizza V. Risk of MERS importation and onward transmission: a systematic review and analysis of cases reported to WHO. *BMC Infect Dis*. 2016;16(1):448. <https://doi.org/10.1186/s12879-016-1787-5> PMID: [27562369](https://pubmed.ncbi.nlm.nih.gov/27562369/)
38. Gilbert M, Pullano G, Pinotti F, Valdano E, Poletto C, Boëlle P-Y, et al. Preparedness and vulnerability of African countries against importations of COVID-19: a modelling study. *Lancet*. 2020;395(10227):871–7. [https://doi.org/10.1016/S0140-6736\(20\)30411-6](https://doi.org/10.1016/S0140-6736(20)30411-6) PMID: [32087820](https://pubmed.ncbi.nlm.nih.gov/32087820/)
39. Gatto M, Bertuzzo E, Mari L, Miccoli S, Carraro L, Casagrandi R, et al. Spread and dynamics of the COVID-19 epidemic in Italy: Effects of emergency containment measures. *Proc Natl Acad Sci U S A*. 2020;117(19):10484–91. <https://doi.org/10.1073/pnas.2004978117> PMID: [32327608](https://pubmed.ncbi.nlm.nih.gov/32327608/)
40. Zhang Q, Sun K, Chinazzi M, Pastore Y Piontti A, Dean NE, Rojas DP, et al. Spread of Zika virus in the Americas. *Proc Natl Acad Sci U S A*. 2017;114(22):E4334–43. <https://doi.org/10.1073/pnas.1620161114> PMID: [28442561](https://pubmed.ncbi.nlm.nih.gov/28442561/)
41. Liu Q-H, Ajelli M, Aleta A, Merler S, Moreno Y, Vespignani A. Measurability of the epidemic reproduction number in data-driven contact networks. *Proc Natl Acad Sci U S A*. 2018;115(50):12680–5. <https://doi.org/10.1073/pnas.1811115115> PMID: [30463945](https://pubmed.ncbi.nlm.nih.gov/30463945/)
42. Mode CJ. Multitype branching processes; theory and applications. New York, NY, USA: American Elsevier Pub. Co. 1971.
43. Contreras DA, Colosi E, Bassignana G, Colizza V, Barrat A. Impact of contact data resolution on the evaluation of interventions in mathematical models of infectious diseases. *J R Soc Interface*. 2022;19(191):20220164. <https://doi.org/10.1098/rsif.2022.0164> PMID: [35730172](https://pubmed.ncbi.nlm.nih.gov/35730172/)
44. Horn RA, Johnson CR. Matrix Analysis. Cambridge University Press. 1990. <http://www.amazon.com/Matrix-Analysis-Roger-Horn/dp/0521386322%3FSubscriptionId%3D192BW6DQ43CK9FN0ZG3G2%26tag%3Dws%26linkCode%3Dxm2%26camp%3D2025%26creative%3D165953%26creativeASIN%3D0521386322>
45. Nishiura H, Castillo-Chavez C, Safan M, Chowell G. Transmission potential of the new influenza A(H1N1) virus and its age-specificity in Japan. *Eurosurveillance*. 2009;14(22):19227. <https://doi.org/10.2807/ese.14.22.19227-en>
46. Fraser C, Donnelly CA, Cauchemez S, Hanage WP, Van Kerkhove MD, Hollingsworth TD, et al. Pandemic potential of a strain of influenza A (H1N1): early findings. *Science*. 2009;324(5934):1557–61. <https://doi.org/10.1126/science.1176062> PMID: [19433588](https://pubmed.ncbi.nlm.nih.gov/19433588/)
47. European Commission Statistical Office of the European Union. Applying the degree of urbanisation: a methodological manual to define cities, towns and rural areas for international comparisons. LU: Publications Office. 2021. <https://data.europa.eu/doi/10.2785/706535>
48. Ruktanonchai NW, DeLeenheer P, Tatem AJ, Alegana VA, Caughlin TT, Zu Erbach-Schoenberg E, et al. Identifying Malaria Transmission Foci for Elimination Using Human Mobility Data. *PLoS Comput Biol*. 2016;12(4):e1004846. <https://doi.org/10.1371/journal.pcbi.1004846> PMID: [27043913](https://pubmed.ncbi.nlm.nih.gov/27043913/)
49. Fischer C, Maponga TG, Yadouleton A, Abilio N, Aboce E, Adewumi P, et al. Emergence and spread of the SARS-CoV-2 omicron (BA.1) variant across Africa: an observational study. *Lancet Glob Health*. 2025;13(2):e256–67. [https://doi.org/10.1016/S2214-109X\(24\)00419-4](https://doi.org/10.1016/S2214-109X(24)00419-4) PMID: [39890226](https://pubmed.ncbi.nlm.nih.gov/39890226/)
50. Klink GV, Safina KR, Garushyants SK, Moldovan M, Nabieva E, Komissarov AB, et al. Spread of endemic SARS-CoV-2 lineages in Russia before April 2021. *PLoS One*. 2022;17(7):e0270717. <https://doi.org/10.1371/journal.pone.0270717> PMID: [35857745](https://pubmed.ncbi.nlm.nih.gov/35857745/)
51. Public Health Agency of Canada, National Microbiology Laboratory. COVID-19: PHAC Modelling Group Report. Public Health Agency of Canada. 2021. [https://nccid.ca/wp-content/uploads/sites/2/2021/01/Modelling-Group-report-2020\\_01\\_14\\_Final.pdf](https://nccid.ca/wp-content/uploads/sites/2/2021/01/Modelling-Group-report-2020_01_14_Final.pdf)
52. Krkošek M, Jarvis-Cross M, Wadhawan K, Berry I, Soucy J-PR, Bodner K, et al. Establishment, contagiousness, and initial spread of SARS-CoV-2 in Canada. *FACETS*. 2021;6:180–94. <https://doi.org/10.1139/facets-2020-0055>
53. Jia JS, Lu X, Yuan Y, Xu G, Jia J, Christakis NA. Population flow drives spatio-temporal distribution of COVID-19 in China. *Nature*. 2020;582(7812):389–94. <https://doi.org/10.1038/s41586-020-2284-y> PMID: [32349120](https://pubmed.ncbi.nlm.nih.gov/32349120/)
54. Iyer S, Karrer B, Citron DT, Kooti F, Maas P, Wang Z, et al. Large-scale measurement of aggregate human colocation patterns for epidemiological modeling. *Epidemics*. 2023;42:100663. <https://doi.org/10.1016/j.epidem.2022.100663> PMID: [36724622](https://pubmed.ncbi.nlm.nih.gov/36724622/)
55. Calmon L, Colosi E, Bassignana G, Barrat A, Colizza V. Preserving friendships in school contacts: An algorithm to construct synthetic temporal networks for epidemic modelling. *PLoS Comput Biol*. 2024;20(12):e1012661. <https://doi.org/10.1371/journal.pcbi.1012661> PMID: [39652593](https://pubmed.ncbi.nlm.nih.gov/39652593/)
56. Goeyvaerts N, Santermans E, Potter G, Torneri A, Van Kerckhove K, Willem L, et al. Household members do not contact each other at random: implications for infectious disease modelling. *Proc Biol Sci*. 2018;285(1893):20182201. <https://doi.org/10.1098/rspb.2018.2201> PMID: [30963910](https://pubmed.ncbi.nlm.nih.gov/30963910/)

57. Loedy N, Wallinga J, Hens N, Torneri A. Repetition in social contacts: implications in modelling the transmission of respiratory infectious diseases in pre-pandemic and pandemic settings. *Proc Biol Sci*. 2024;291(2027):20241296. <https://doi.org/10.1098/rspb.2024.1296> PMID: [39043233](https://pubmed.ncbi.nlm.nih.gov/39043233/)
58. Ascione C, Valdano E. Interplay of generation time and spatial structure in epidemic dynamics and the reliability of reproduction ratio estimates. *Phys Rev Research*. 2026;8(1). <https://doi.org/10.1103/32b8-x9z5>
59. Keiding N. Statistical inference in branching processes. *Advances in Applied Probability*. 1978;10(2):266–266. <https://doi.org/10.2307/1426874>
60. Stan Development Team. Stan Modeling Language Users Guide and Reference Manual. 2023. <https://mc-stan.org>
